# Supplementary material for: Lebenskompetenzen als Ressourcen für die psychosomatische Behandlung
Source: Atypon-hosted journal article supplement (doi:10.1026/0012-1924/a000278), 2021-11-19
Supplement: 0012-1924_a000278_esm1.pdf [file 0012-1924_a000278_esm1.pdf]

*Elektronisches Supplement 1. Lebenskompetenz-Fragebogen mit 18 Items und 6 Dimensionen.*

| Nr. | Frage                                                      | Dimension         |
|-----|------------------------------------------------------------|-------------------|
| 1.  | Ich erlebe positive Gefühle in meinem Leben                | Wohlbefinden      |
| 2.  | Ich habe ein angenehmes Leben                              |                   |
| 3.  | Ich fühle mich glücklich                                   |                   |
| 4.  | Ich besitze innere Stärke und Widerstandsfähigkeit         | Selbstregulation  |
| 5.  | Ich kann mich balancieren und ausgleichen                  |                   |
| 6.  | Ich kann mich entspannen und innerlich loslassen           |                   |
| 7.  | Ich gehe in meinen Aktivitäten auf                         | Engagement        |
| 8.  | Ich identifiziere mich mit dem was ich tue                 |                   |
| 9.  | Ich führe ein engagiertes Leben                            |                   |
| 10. | Ich bin ein bewusst lebender Mensch                        | Sinnerleben       |
| 11. | Ich empfinde Sinn in meinem Leben                          |                   |
| 12. | Glaube, Religion oder Werte geben mir Kraft                |                   |
| 13. | Ich erreiche meine Ziele                                   | Selbstwirksamkeit |
| 14. | Ich kann etwas bewirken                                    |                   |
| 15. | Ich bin erfolgreich in meinem Leben                        |                   |
| 16. | Ich erfahre menschliche Unterstützung im Leben             | Sozialkontakte    |
| 17. | Ich habe gute enge Beziehungen (Partner, Familie, Freunde) |                   |
| 18. | Ich habe Zeit für befriedigende Kontakte                   |                   |
