# Supplementary material for: Lebenskompetenzen als Ressourcen für die psychosomatische Behandlung
Source: Atypon-hosted journal article supplement (doi:10.1026/0012-1924/a000278), 2021-11-19
Supplement: 0012-1924_a000278_esm2.pdf [file 0012-1924_a000278_esm2.pdf]

*Elektronisches Supplement 2. Mittelwerte und Vergleich der Datensätze hinsichtlich Demografie und Diagnostik.*

| Datensatz               | Set1a    | Set1b    | Set2A    | Set2E    | Set2A vs. Set1           | Set2E-Set2A              |
|-------------------------|----------|----------|----------|----------|--------------------------|--------------------------|
| Messzeitpunkt           | Auf      | Auf      | Auf      | Ent      | Auf-Auf                  | Ent-Auf                  |
| Messgröße               | <i>M</i> | <i>M</i> | <i>M</i> | <i>M</i> | Wilcoxon<br><i>z (p)</i> | Wilcoxon<br><i>z (p)</i> |
| <i>n</i> (Anzahl)       | 1 027    | 1 027    | 1 459    | 1 459    | -                        | -                        |
| Alter (Jahre)           | 48.3     | 48.4     | 48.1     | 48.1     | -.29 (n.s.)              | -                        |
| Geschlecht (% weiblich) | 72       | 70       | 70       | 70       | -.30 (n.s.)              | -                        |
| Aufenthaltsdauer (Tage) | 39.22    | 39.72    | 39.75    | 39.75    | 1.17 (n.s.)              | -                        |
| GAF                     | 45.57    | 45.10    | 45.65    | 57.25    | .98 (n.s.)               | 26.44**                  |
| GARF                    | 45.72    | 45.38    | 45.52    | 60.40    | -.15 (n.s.)              | 26.03**                  |
| ISR Gesamtscore         | 1.33     | 1.34     | 1.31     | .89      | -1.25 (n.s.)             | -21.24**                 |
| ISR Depression          | 2.34     | 2.39     | 2.34     | 1.18     | -.85 (n.s.)              | -31.73**                 |
| ISR Angst               | 1.82     | 1.74     | 1.76     | 1.25     | -.66 (n.s.)              | -13.11**                 |
| ISR Zwang               | 1.31     | 1.33     | 1.27     | .94      | -1.04 (n.s.)             | -8.22**                  |
| ISR Somatisierung       | .75      | .84      | .79      | .54      | -.18 (n.s.)              | -7.71**                  |
| ISR Essstörungen        | .62      | .64      | .61      | .49      | -.37 (n.s.)              | -3.02*                   |
| ISR Zusatzitems         | 1.25     | 1.23     | 1.20     | .90      | -1.73 (n.s.)             | -15.16**                 |
| PTSB                    | 1.93     | 1.93     | 1.90     | -        | -1.33 (n.s.)             | -                        |

*Anmerkungen:* \*  $p < .01$ , \*\*  $p < .001$ , Auf = Aufnahmezeitpunkt, Ent = Entlasszeitpunkt, M = Mittelwert, ISR = ICD-10 Symptom Rating, GAF = Global Assessment of Functioning, GARF = Global Assessment of Relational Functioning nach operationalisierter psychodynamischer Diagnostik OPD2, PTSB = Posttraumatische Stressbelastung.
