# Supplementary material for: Lebenskompetenzen als Ressourcen für die psychosomatische Behandlung
Source: Atypon-hosted journal article supplement (doi:10.1026/0012-1924/a000278), 2021-11-19
Supplement: 0012-1924_a000278_esm4.pdf [file 0012-1924_a000278_esm4.pdf]

*Elektronisches Supplement 4. Interkorrelationen der Faktoren getrennt nach Set und Erhebungszeitpunkten (Set 1, Set 2A und Set 2E).*

| Set 1 ( <i>n</i> = 2 054)<br><i>r</i> (Spearman)  | Wohlbe-<br>finden | Selbst-<br>regulation | Engage-<br>ment | Sinn-<br>erleben | Selbstwirk-<br>samkeit | Sozialkon-<br>takte |
|---------------------------------------------------|-------------------|-----------------------|-----------------|------------------|------------------------|---------------------|
| Wohlbefinden                                      | 1.00              |                       |                 |                  |                        |                     |
| Selbstregulation                                  | .482              | 1.00                  |                 |                  |                        |                     |
| Engagement                                        | .506              | .482                  | 1.00            |                  |                        |                     |
| Sinnerleben                                       | .549              | .561                  | .565            | 1.00             |                        |                     |
| Selbstwirksamkeit                                 | .524              | .509                  | .574            | .540             | 1.00                   |                     |
| Sozialkontakte                                    | .453              | .238                  | .294            | .316             | .342                   | 1.00                |
| Set 2A ( <i>n</i> = 1 459)<br><i>r</i> (Spearman) | Wohlbe-<br>finden | Selbst-<br>regulation | Engage-<br>ment | Sinn-<br>erleben | Selbstwirk-<br>samkeit | Sozialkon-<br>takte |
| Wohlbefinden                                      | 1.00              |                       |                 |                  |                        |                     |
| Selbstregulation                                  | .450              | 1.00                  |                 |                  |                        |                     |
| Engagement                                        | .490              | .469                  | 1.00            |                  |                        |                     |
| Sinnerleben                                       | .513              | .543                  | .549            | 1.00             |                        |                     |
| Selbstwirksamkeit                                 | .511              | .518                  | .561            | .537             | 1.00                   |                     |
| Sozialkontakte                                    | .460              | .224                  | .297            | .318             | .331                   | 1.00                |
| Set 2E ( <i>n</i> = 1 459)<br><i>r</i> (Spearman) | Wohlbe-<br>finden | Selbst-<br>regulation | Engage-<br>ment | Sinn-<br>erleben | Selbstwirk-<br>samkeit | Sozialkon-<br>takte |
| Wohlbefinden                                      | 1.00              |                       |                 |                  |                        |                     |
| Selbstregulation                                  | .652              | 1.00                  |                 |                  |                        |                     |
| Engagement                                        | .646              | .609                  | 1.00            |                  |                        |                     |
| Sinnerleben                                       | .606              | .602                  | .624            | 1.00             |                        |                     |
| Selbstwirksamkeit                                 | .636              | .624                  | .655            | .595             | 1.00                   |                     |
| Sozialkontakte                                    | .602              | .435                  | .462            | .454             | .490                   | 1.00                |
