# Supplementary material for: Lebenskompetenzen als Ressourcen für die psychosomatische Behandlung
Source: Atypon-hosted journal article supplement (doi:10.1026/0012-1924/a000278), 2021-11-19
Supplement: 0012-1924_a000278_esm5.pdf [file 0012-1924_a000278_esm5.pdf]

*Elektronisches Supplement 5. Faktorladungen und Standardfehler der konfirmatorischen Faktoranalysen.*

| Nr. | Dimension         | Standardisierte<br>Faktorladungen |        | Standardfehler |        |
|-----|-------------------|-----------------------------------|--------|----------------|--------|
|     |                   | Set 1b                            | Set 2E | Set 1b         | Set 2E |
| 1   | Wohlbefinden      | .810                              | .804   | .015           | .011   |
| 2   | Wohlbefinden      | .724                              | .812   | .018           | .011   |
| 3   | Wohlbefinden      | .797                              | .850   | .015           | .010   |
| 4   | Selbstregulation  | .657                              | .731   | .022           | .014   |
| 5   | Selbstregulation  | .842                              | .869   | .016           | .010   |
| 6   | Selbstregulation  | .673                              | .756   | .021           | .013   |
| 7   | Engagement        | .710                              | .785   | .019           | .012   |
| 8   | Engagement        | .734                              | .820   | .018           | .011   |
| 9   | Engagement        | .811                              | .840   | .015           | .010   |
| 10  | Sinnerleben       | .674                              | .780   | .020           | .013   |
| 11  | Sinnerleben       | .826                              | .860   | .015           | .010   |
| 12  | Sinnerleben       | .567                              | .582   | .024           | .019   |
| 13  | Selbstwirksamkeit | .764                              | .829   | .016           | .010   |
| 14  | Selbstwirksamkeit | .874                              | .868   | .011           | .009   |
| 15  | Selbstwirksamkeit | .799                              | .868   | .014           | .009   |
| 16  | Sozialkontakte    | .810                              | .846   | .019           | .012   |
| 17  | Sozialkontakte    | .803                              | .826   | .019           | .013   |
| 18  | Sozialkontakte    | .516                              | .640   | .027           | .018   |
