# Supplementary material for: Lebenskompetenzen als Ressourcen für die psychosomatische Behandlung
Source: Atypon-hosted journal article supplement (doi:10.1026/0012-1924/a000278), 2021-11-19
Supplement: 0012-1924_a000278_esm6.pdf [file 0012-1924_a000278_esm6.pdf]

*Elektronisches Supplement 6.* Korrelation der Lebenskompetenzen mit ISR Symptomratings, Strukturniveau und Trauma jeweils zum Aufnahmezeitpunkt (Set1).

| Korrelation <i>r</i> | Gesamt LK | Wohl-<br>befinden | Selbst-<br>regulation | Engagement | Sinnerleben | Selbst-<br>wirksamkeit | Sozial-<br>kontakte |
|----------------------|-----------|-------------------|-----------------------|------------|-------------|------------------------|---------------------|
| ISR Gesamtscore      | -.444     | -.407             | -.391                 | -.324      | -.341       | -.350                  | -.219               |
| ISR Depression       | -.589     | -.552             | -.468                 | -.460      | -.448       | -.454                  | -.275               |
| ISR Angst            | -.286     | -.245             | -.309                 | -.224      | -.209       | -.254                  | -.093               |
| ISR Zwang            | -.264     | -.234             | -.241                 | -.169      | -.224       | -.207                  | -.130               |
| ISR Somatisierung    | -.126     | -.098             | -.118                 | -.091      | -.075       | -.108                  | -.117               |
| ISR Essstörungen     | -.084     | -.062             | -.091                 | -.044      | -.080       | -.062                  | -.051               |
| ISR Zusatzitems      | -.373     | -.379             | -.278                 | -.281      | -.265       | -.281                  | -.225               |
| Strukturniveau       | .315      | .274              | .199                  | .225       | .276        | .282                   | .166                |
| PTSB                 | -.272     | -.308             | -.177                 | -.172      | -.205       | -.212                  | -.167               |
| Traumaerlebnisse     | -.067     | -.114             | .042                  | -.022      | -.007       | -.072                  | -.119               |

*Anmerkungen:* Alle  $r > .045$  sind  $p < .05$ , alle  $r > .06$  sind mit  $p < .001$ ; grün = positive Korrelationen, rot = negative Korrelationen; LK = Lebenskompetenzen; PTSB = posttraumatische Stressbelastung,  $n = 1\ 862$ ;  $n$  (Traumaerlebnisse) = 1 945;  $n$  (ISR und Strukturniveau) = 2 054.
