# Supplementary material for: Lebenskompetenzen als Ressourcen für die psychosomatische Behandlung
Source: Atypon-hosted journal article supplement (doi:10.1026/0012-1924/a000278), 2021-11-19
Supplement: 0012-1924_a000278_esm7.pdf [file 0012-1924_a000278_esm7.pdf]

*Elektronisches Supplement 7. Korrelation der Lebenskompetenzen mit ICD10-basierten Symptomrating  
ISR jeweils zum Entlasszeitpunkt (Set2E).*

| Korrelation <i>r</i> | Gesamt<br>LK | Wohl-<br>befinde<br>n | Selbst-<br>regulatio<br>n | Engagemen<br>t | Sinnerlebe<br>n | Selbst-<br>wirksamkei<br>t | Sozial-<br>kontakt<br>e |
|----------------------|--------------|-----------------------|---------------------------|----------------|-----------------|----------------------------|-------------------------|
| ISR Gesamtscore      | -.579        | -.545                 | -.530                     | -.458          | -.438           | -.481                      | -.369                   |
| ISR Depression       | -.692        | -.673                 | -.605                     | -.576          | -.508           | -.576                      | -.427                   |
| ISR Angst            | -.473        | -.428                 | -.453                     | -.392          | -.353           | -.383                      | -.289                   |
| ISR Zwang<br>ISR     | -.391        | -.372                 | -.360                     | -.299          | -.315           | -.323                      | -.244                   |
| Somatisierung        | -.226        | -.186                 | -.216                     | -.166          | -.163           | -.200                      | -.181                   |
| ISR Essstörungen     | -.124        | -.109                 | -.106                     | -.088          | -.137           | -.083                      | -.087                   |
| ISR Zusatzitems      | -.415        | -.396                 | -.371                     | -.320          | -.297           | -.351                      | -.291                   |

*Anmerkungen:* Alle  $r < -.085$  haben  $p < .001$ ; LK = Lebenskompetenzen; Farben zeigen Stärke der Korrelationen.
