# Supplementary material for: Lebenskompetenzen als Ressourcen für die psychosomatische Behandlung
Source: Atypon-hosted journal article supplement (doi:10.1026/0012-1924/a000278), 2021-11-19
Supplement: 0012-1924_a000278_esm8.pdf [file 0012-1924_a000278_esm8.pdf]

*Elektronisches Supplement 8.* Überprüfung der Messinvarianz zwischen den Datensätzen 1a ( $n = 1\,027$ ) und 1b ( $n = 1\,027$ ), sowie den paarweisen Datensätzen aus den Erhebungen bei Aufnahme (Set2A) und Entlassung (Set2E) mit  $n = 1\,459$ .

| Parameter       | Messinv. zwischen Set1a und Set1b |                     |                   | Prä-Post Messinv. zwischen Set2A und Set2E |                     |                   |
|-----------------|-----------------------------------|---------------------|-------------------|--------------------------------------------|---------------------|-------------------|
|                 | Konfigurale Invarianz             | Metrische Invarianz | Skalare Invarianz | Konfigurale Invarianz                      | Metrische Invarianz | Skalare Invarianz |
| CFI             | .939                              | .938                | .939              | .953                                       | .952                | .944              |
| TLI             | .922                              | .925                |                   | .941                                       | .941                |                   |
| RMSEA           | .066                              | .064                | .063              | .062                                       | .061                | .065              |
| KI (RMSEA)      | [.062 .069]                       | [.061 .068]         |                   | [.059 .065]                                | [.059 .064]         |                   |
| SRMR            | .047                              | .049                |                   | .042                                       | .047                |                   |
| $\chi^2$        | 1298***                           | 1317***             | 1324***           | 1577***                                    | 1640***             | 1882***           |
| $df$            | 240                               | 252                 | 264               | 240                                        | 252                 | 264               |
| $\Delta df$     |                                   | 12                  | 12                |                                            | 12                  | 12                |
| $\Delta \chi^2$ |                                   | 19.0 n.s.           | 6.81 n.s.         |                                            | 63.3***             | 242***            |

*Anmerkungen:* \*\*\*  $p < .001$ , CFI = Comparative Fit Index, TLI = Tucker-Lewis Index, RMSEA = Root-Mean-Square-Error-of-Approximation, KI (RMSEA) = 90 % Konfidenzintervall des RMSEA,  $df$  = Freiheitsgrade,  $\Delta df$  = Differenz der Freiheitsgrade,  $\Delta \chi^2 = \chi^2$ -Differenztest.
