# Supplementary material for: Lebenskompetenzen als Ressourcen für die psychosomatische Behandlung
Source: Atypon-hosted journal article supplement (doi:10.1026/0012-1924/a000278), 2021-11-19
Supplement: 0012-1924_a000278_esm9.pdf [file 0012-1924_a000278_esm9.pdf]

*Elektronisches Supplement 9.* Korrelate der therapeutischen Veränderung der Lebenskompetenzen zeigen die Korrelate der initialen Lebenskompetenzen zu den Therapieeffekten

| Lebenskompetenzen | Korrelation $r$ zu $\Delta$ LK18 |                         |             |           | Korrelation $r$ zu LK18 bei Aufnahme |                                      |             |           |
|-------------------|----------------------------------|-------------------------|-------------|-----------|--------------------------------------|--------------------------------------|-------------|-----------|
|                   | $\Delta$ ISR Ges.                | $\Delta$ ISR Depression | Psych. Ver. | Ges. Ver. | $\Delta$ ISR Ges. <sup>°</sup>       | $\Delta$ ISR Depression <sup>°</sup> | Psych. Ver. | Ges. Ver. |
| Gesamtwert        | -.430                            | -.540                   | .229        | .476      | -.170                                | -.201                                | .145        | .260      |
| Wohlbefinden      | -.404                            | -.513                   | .215        | .429      | -.115                                | -.138                                | .061        | .103      |
| Selbstregulation  | -.337                            | -.418                   | .178        | .392      | -.099                                | -.103                                | .081        | .179      |
| Engagement        | -.260                            | -.334                   | .131        | .288      | -.118                                | -.155                                | .100        | .229      |
| Sinnerleben       | -.333                            | -.377                   | .157        | .333      | -.125                                | -.126                                | .120        | .148      |
| Selbstwirksamkeit | -.317                            | -.379                   | .162        | .340      | -.127                                | -.155                                | .111        | .169      |
| Sozialkontakte    | -.207                            | -.274                   | .128        | .247      | -.098                                | -.108                                | .101        | .188      |

*Anmerkungen:*  $\Delta$ LK18 = Post-Prä-Differenz des LK18 Set2E-Set2A,  $n = 1\,459$ .,  $\Delta$ ISR = Post-Prä-Differenz des ICD10-basierten Symptomratings (ISR), ISR Ges. = Gesamtsymptombelastung, Psych. Ver. = psychische Veränderung in der Therapeuteneinschätzung, Ges.Ver. = Gesamtveränderung im Fragebogen GV, <sup>°</sup> = Partialkorrelation mit Patientinnen und Patienten mit schwerer Symptombelastung ( $n = 340$ ) bei Aufnahme. ISR Ges. diente als Kontrollvariable.
