# Supplementary figures and images for: Lebenskompetenzen als Ressourcen für die psychosomatische Behandlung
Source: Atypon-hosted journal article supplement (doi:10.1026/0012-1924/a000278), 2021-11-19

*Elektronisches Supplement 3.* Screeplot von Set1a der 18 Items des Lebenskompetenz-Fragebogens, n = 1 027.

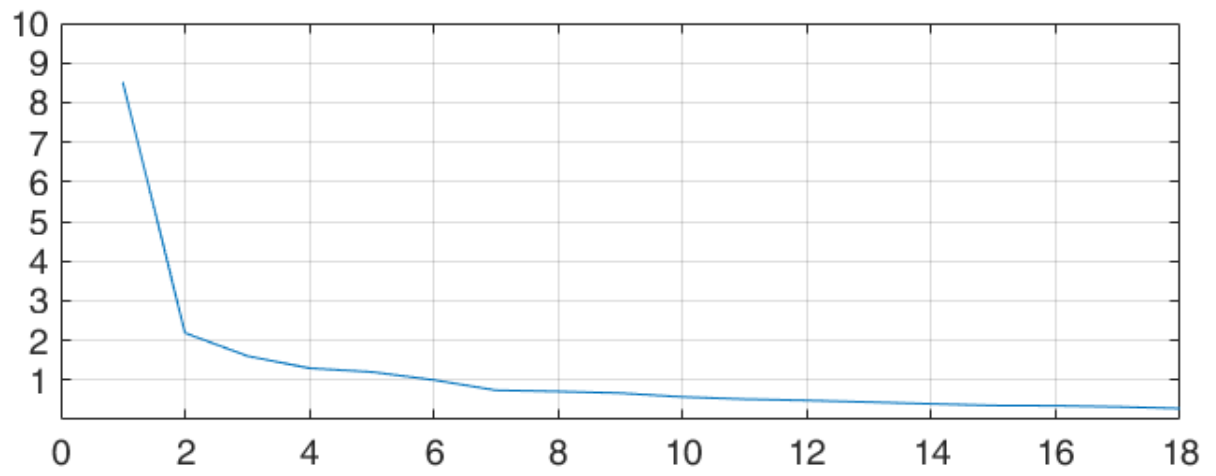

Supplement: 0012-1924_a000278_esm3.pdf [file 0012-1924_a000278_esm3.pdf]
